# Supplementary material for: A sensitive and versatile method for characterization of protein-mediated transformations of quantum dots
Source: Royal Society of Chemistry journal article supplement (doi:10.1039/c6an00276e), 2016-01-01
Supplement: c6an00276e1.pdf [file c6an00276e1.pdf]

## Electronic supporting information

**Table S-1** Selection of QD–protein studies highlighting the methods used to acquire the binding information

| QD type (size <sup>a</sup> ) | Functionalization                                 | Protein <sup>b</sup>                     | Method <sup>c</sup> | Binding information                                                             | Ref. <sup>d</sup> |
|------------------------------|---------------------------------------------------|------------------------------------------|---------------------|---------------------------------------------------------------------------------|-------------------|
| CdTe                         | mercaptopropionic acid                            | BSA                                      | CE-LIF              | binding constant                                                                | 1                 |
| CdTe                         | <i>N</i> -hydroxysulfo-succinimide                | transferrin                              | CE-LIF, CE-UV       | stoichiometry                                                                   | 2                 |
| CdTe                         | mercaptopropionic acid                            | BSA, horseradish peroxidase              | CE-LIF              | percentage of conjugate                                                         | 3                 |
| CdTe                         | mercaptopropionic acid                            | glycoprotein (lectin), antibody anti-vWF | CE-LIF              | percentage of conjugate                                                         | 4                 |
| CdSe/ZnS (4.8 nm)            | glutathione                                       | denatured BSA                            | CE-FL               | dissociation constant, cooperativity coefficient                                | 5                 |
| CdSe/ZnS                     | glutathione                                       | protein A                                | CE-FL               | stoichiometry                                                                   | 6                 |
| CdTe                         | 2-mercaptoethylamine hydrochloride                | HSA                                      | FL                  | binding constant                                                                | 7                 |
| CdTe (3 nm)                  | mercaptoacetic acid                               | BSA                                      | FL                  | association constant                                                            | 8                 |
| CdSe/ZnS (4 nm)              | D-penicillamine or mercaptosuccinic acid          | HSA                                      | FL                  | binding constant, number of binding sites, location of binding sites on protein | 9                 |
|                              |                                                   |                                          | CD, FT-IR           | conformational changes of proteins                                              |                   |
| CdS (2–3 nm)                 | mercaptopropionic acid, L-cysteine or glutathione | lysozyme, BSA                            | FL                  | binding constant, number of binding sites                                       | 10                |
|                              |                                                   |                                          | CD                  | conformational changes of proteins                                              |                   |
| ZnS (6 nm)                   | mercaptoacetic acid                               | BSA                                      | FL                  | binding constant, number of                                                     | 11                |

|          |                              |                                                     |           | binding sites                               |    |
|----------|------------------------------|-----------------------------------------------------|-----------|---------------------------------------------|----|
| CdSe/ZnS | 2-aminoethanethiol           | HSA, $\alpha$ 1-acid glycoprotein, immunoglobulin G | SPR       | association and dissociation rate constants | 12 |
| CdSe/ZnS | mercaptoacetic acid (3.4 nm) | HSA                                                 | FL        | location of binding sites on protein        | 13 |
|          |                              |                                                     | CD, FT-IR | conformational changes of proteins          |    |
|          |                              |                                                     | DLS       | stoichiometry                               |    |

<sup>a</sup> Where available. <sup>b</sup> BSA = bovine serum albumin; HSA = human serum albumin. <sup>b</sup> LIF = laser-induced fluorescence; FL = fluorescence spectroscopy; CD = circular dichroism spectroscopy; FT-IR = Fourier transform infrared spectroscopy; SPR = surface plasmon resonance spectroscopy; DLS = dynamic light scattering. <sup>d</sup> (1) Shao, L. W.; Dong, C. Q.; Huang, X. Y.; Ren, J. C. *Chin. Chem. Lett.* **2008**, *19*, 707–710; (2) Mei, F.; Zhao, X.-Y.; Zhang, L.; Qu, F. *Chin. J. Anal. Chem.* **2013**, *41*, 725–731; (3) Huang, X.; Weng, J.; Sang, F.; Song, X.; Cao, C.; Ren, J. *J. Chromatogr. A* **2006**, *1113*, 251–254; (4) Weng, J.; Song, X.; Li, L.; Qian, H.; Chen, K.; Xu, X.; Cao, C.; Ren, J. *Talanta* **2006**, *70*, 397–402; (5) Wang, J.; Li, J.; Li, J.; Qin, Y.; Wang, C.; Qiu, L.; Jiang, P. *Electrophoresis* **2015**, *36*, 1523–1528; (6) Wang, J.; Qiu, L.; Wang, C.; Zhang, Y.; Li, J.; Xia, J.; Jiang, P. *Int. J. Mol. Sci.* **2013**, *14*, 19146–19154; (7) He, Y.; Yin, P.; Gong, H.; Peng, J.; Liu, S.; Fan, X.; Yan, S. *Sens. Actuators B* **2011**, *157*, 8–13; (8) Fan, J.; Zhou, J.; Sun, T.; Lü, S.; Tang, J.; Lü, J. *Chin. J. Chem.* **2010**, *28*, 2353–2358; (9) Bai, J.; Wang, T.; Wang, Y.; Jiang, X. *Biomater. Sci.* **2014**, *2*, 493–501; (10) Huang, D.; Geng, F.; Liu, Y.; Wang, X.; Jiao, J.; Yu, L. *Colloids Surfaces A* **2011**, *392*, 191–197; (11) Wu, D.; Chen, Z.; Liu, X. *Spectrochim. Acta Mol. Biomol. Spectrosc.* **2011**, *84*, 178–183; (12) Xiao, Q.; Zhou, B.; Huang, S.; Tian, F.; Guan, H.; Ge, Y.; Liu, X.; He, Z.; Liu, Y. *Nanotechnol.* **2009**, *20*, 325101–325107; (13) Xiao, Q.; Huang, S.; Qi, Z.-D.; Zhou, B.; He, Z.-K.; Liu, Y. *Biochim. Biophys. Acta* **2008**, *1784*, 1020–1027.

**Table S-2** Effect of background concentration on detectability<sup>a</sup>

| HEPES concentration (mM) | Peak area ( $\times 10^3$ , arbitrary units) |
|--------------------------|----------------------------------------------|
| 10                       | 631.1                                        |
| 20                       | 704.1                                        |
| 40                       | 483.2                                        |
| 60                       | 447.1                                        |

<sup>a</sup> 1.17  $\mu\text{mol L}^{-1}$  Cd; voltage, 10 kV; other conditions as in Table 1.

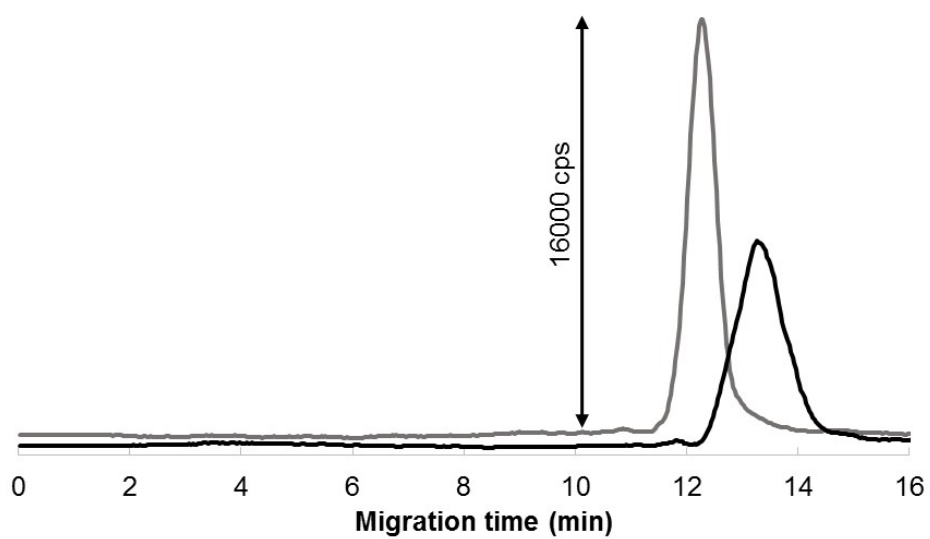

**Fig. S-1** Electropherograms of QDs ( $1.17 \mu\text{mol L}^{-1}$  Cd) using different background electrolytes (gray – 10 mM HEPES, pH 7.4; black – 10 mM phosphate buffer, pH 7.4). Other CE-ICP-MS conditions, see Table 1.

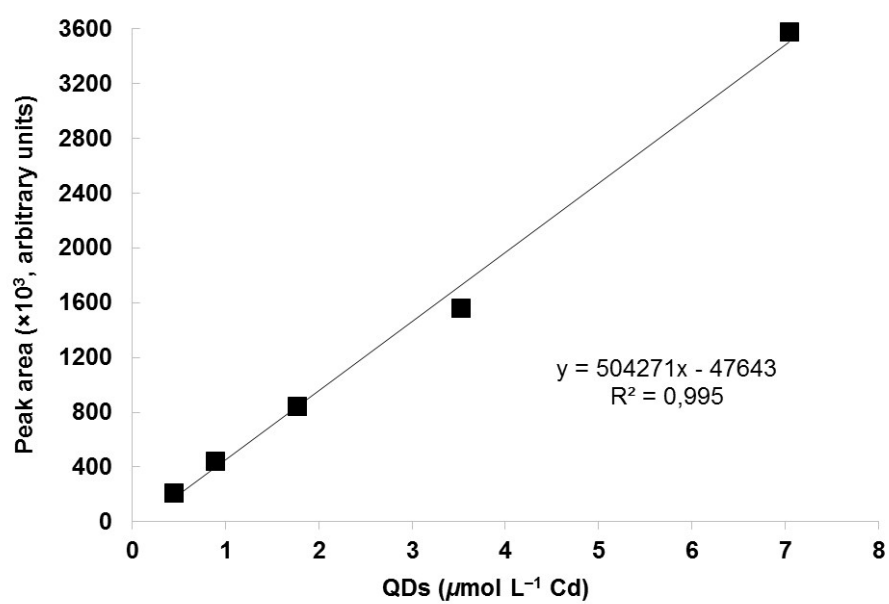

**Fig. S-2** Linear response between the peak area and QDs concentration under optimized CE-ICP-MS conditions.

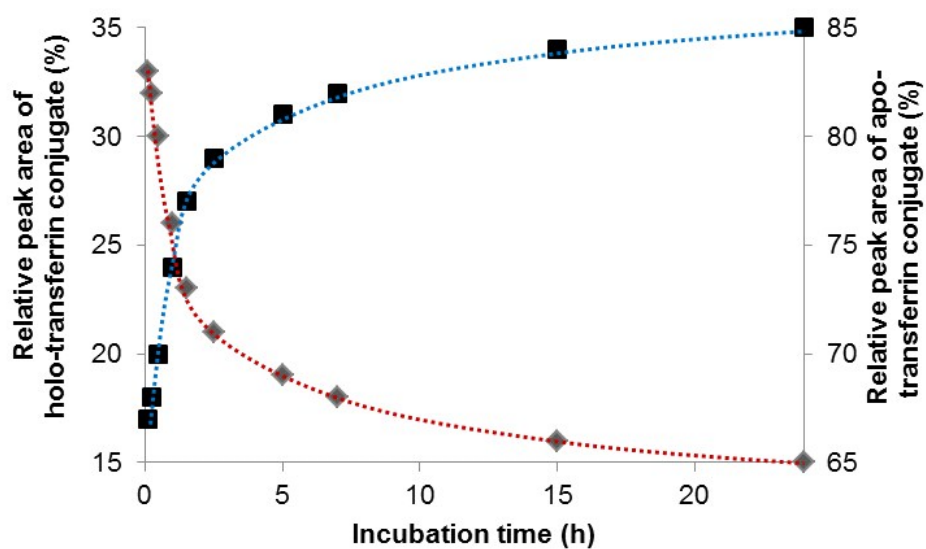

**Fig. S-3** Time-dependent changes in CE-ICP-MS signals of QDs ( $0.877 \mu\text{mol L}^{-1}$  Cd) conjugates with holo-transferrin (diamonds) and apo-transferrin (squares).

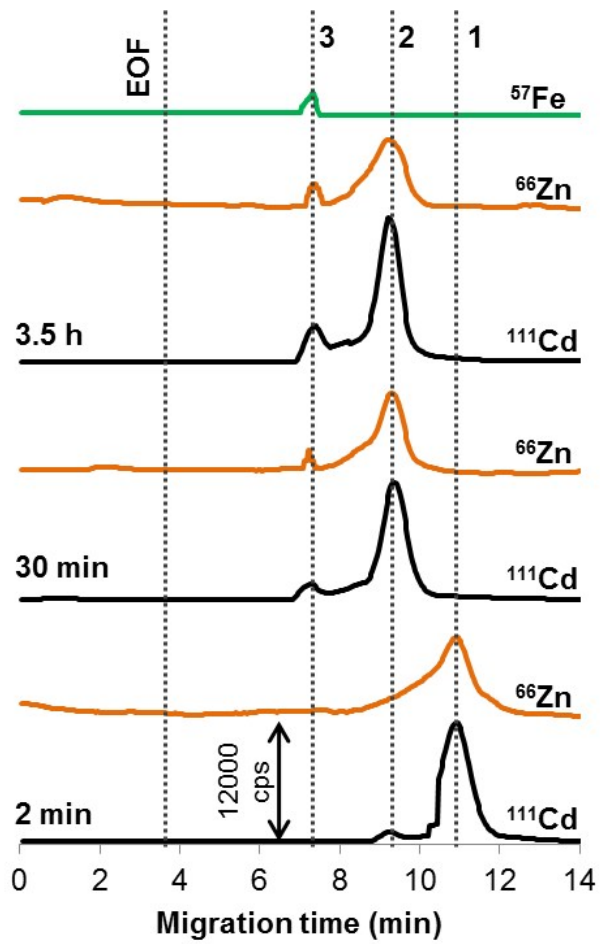

**Fig. S-4** Electropherograms recorded for a mixture of QDs ( $0.675 \mu\text{mol L}^{-1} \text{ Cd}$ ) with transferrin ( $0.3 \text{ g L}^{-1}$ ) and albumin ( $4.5 \text{ g L}^{-1}$ ) at varied incubation time. Peaks: 1 – bare QDs; 2 – albumin conjugate; 3 – transferrin conjugate. See Table 1 and the Experimental section for CE-ICP-MS conditions.

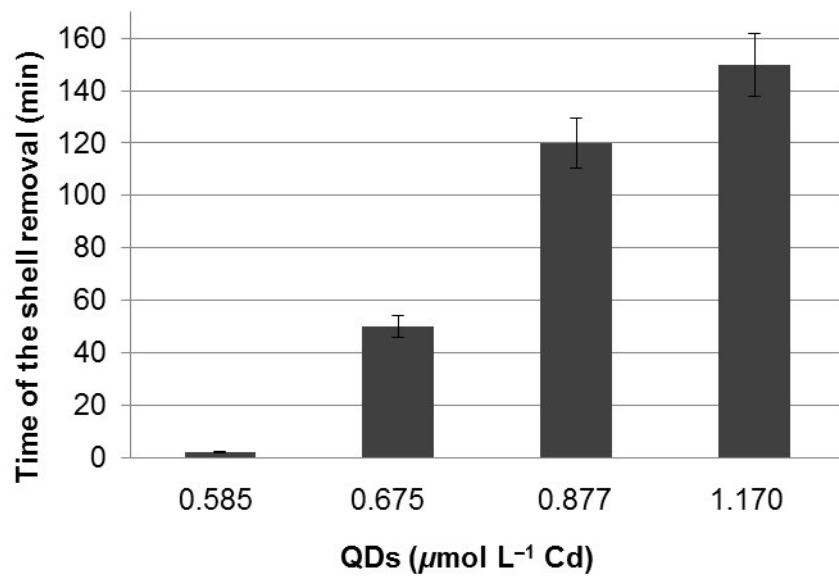

**Fig. S-5** Time required to detaching the shell of QDs, varying in dosages, in 10-fold diluted human serum.
